# Supplementary material for: StaphyloBase: a specialized genomic resource for the staphylococcal research community
Source: Oxford University Press journal article supplement (doi:10.1093/database/bau010), 2014-02-26
Supplement: bau010_Supplementary_Data.zip [file bau010_Supplementary_Data.zip]

Archive with 1 entries (1 files):
- Supplementary_Figure_S1.pdf
